# Supplementary material for: Long-term Parkinson’s disease quality of life after staged DBS: STN vs GPi and first vs second lead
Source: PubMed Central journal article supplement (PMC7338364; doi:10.1038/s41531-020-0115-3), 2020-07-06
Supplement: 41531_2020_115_MOESM1_ESM.pdf [file 41531_2020_115_MOESM1_ESM.pdf]

**Supplementary Table 1** Baseline characteristics for unilateral patients<sup>a</sup>

| Variable (mean±SD)                              | STN<br>(n=70)       | GPI<br>(n=121)       | STN vs. GPI                            |
|-------------------------------------------------|---------------------|----------------------|----------------------------------------|
| Age                                             | 65.07±7.88 (n=70)   | 66.09±7.71 (n=120)   | <i>p</i> =0.39, <i>t</i> =-0.87        |
| Age at Disease Onset                            | 53.57±10.23 (n=65)  | 54.08±9.40 (n=102)   | <i>p</i> =0.99, <i>W</i> =3313         |
| Disease Duration                                | 11.51±6.20 (n=65)   | 11.83±5.69 (n=102)   | <i>p</i> =0.72, <i>W</i> =3205         |
| Gender (male no/no.)                            | 57/70               | 85/120               | <i>p</i> =0.15, $\chi^2$ =2.09         |
| UPDRS-I                                         | 2.81±2.35 (n=63)    | 2.49±1.98<br>(n=108) | <i>p</i> =0.53, <i>W</i> =3597         |
| UPDRS-II                                        | 15.91±5.96 (n=64)   | 15.73±6.17 (n=111)   | <i>p</i> =0.85, <i>t</i> =-0.19        |
| UPDRS-III Off-med                               | 37.34±11.78 (n=65)  | 38.27 ±11.03 (n=114) | <i>p</i> =0.60, <i>t</i> =-0.52        |
| UPDRS-III Off-med<br>Contralateral Tremor       | 4.15±2.46 (n=65)    | 3.09±2.16 (n=114)    | <b><i>p</i>&lt;0.01, <i>W</i>=2725</b> |
| UPDRS-III Off-med<br>Contralateral Rigidity     | 3.45±1.53(n=65)     | 3.57±1.44 (n=114)    | <i>p</i> =0.77, <i>W</i> =3608         |
| UPDRS-III Off-med<br>Contralateral Bradykinesia | 7.52±2.62 (n=65)    | 7.5±2.56 (n=114)     | <i>p</i> =0.96, <i>W</i> =3689         |
| UPDRS-III Off-med PIGD                          | 4.29±2.62 (n=65)    | 5.42±3.07 (n=114)    | <b><i>p</i>&lt;0.01, <i>W</i>=2828</b> |
| LEDD                                            | 1439±936 (n=68)     | 1407±822 (n=118)     | <i>p</i> =0.85, <i>W</i> =3947         |
| Berg Balance Scale                              | 51.65±2.91 (n=26)   | 50.30±5.29 (n=73)    | <i>p</i> =0.37, <i>W</i> =836          |
| TUG                                             | 9.55±1.83 (n=31)    | 10.89±11.83 (n=79)   | <i>p</i> =0.55, <i>W</i> =1315         |
| Dopamine Responsiveness                         | -32.32±23.89 (n=62) | -36.24±18.03 (n=109) | <i>p</i> =0.46, <i>W</i> =3607         |
| MMSE                                            | 28.04±2.10 (n=24)   | 28.67±1.73 (n=30)    | <i>p</i> =0.19, <i>W</i> =432          |
| SWAL-QOL                                        | 85.10±10.91 (n=19)  | 80.56±11.27 (n=24)   | <i>p</i> =0.17, <i>W</i> =171          |
| Anxiety                                         | 17.67±7.04 (n=12)   | 15±9.53 (n=40)       | <i>p</i> =0.24, <i>W</i> =185          |
| Depression                                      | 10.52±6.43 (n=31)   | 11.04±7.45 (n=76)    | <i>p</i> =0.95, <i>W</i> =1188         |
| Total PDQ                                       | 30.80±15.25         | 31.73±15.22          | <i>p</i> =0.47, <i>W</i> =4500         |
| Mobility                                        | 36.34±23.02         | 44.49±27.89          | <b><i>p</i>&lt;0.05, <i>W</i>=4978</b> |
| ADL                                             | 39.29±21.41         | 36.00±21.66          | <i>p</i> =0.32, <i>W</i> =3871         |
| Emotional well-being                            | 29.46±19.21         | 30.11±20.22          | <i>p</i> =0.85, <i>W</i> =4303         |
| Stigma                                          | 30±26.03            | 25.57±22.20          | <i>p</i> =0.34, <i>W</i> =4584         |
| Social support                                  | 10.65±13.69         | 15.98±19.58          | <i>p</i> =0.17, <i>W</i> =4721         |
| Cognition                                       | 28.31±18.33         | 29.11±20.14          | <i>p</i> =0.95, <i>W</i> =4214         |
| Communication                                   | 27.02±21.31         | 29.99±21.16          | <i>p</i> =0.34, <i>W</i> =4583         |
| Bodily discomfort                               | 45.36±22.04         | 42.29±22.84          | <i>p</i> =0.44, <i>W</i> =3952         |

<sup>a</sup>Bold values represent significant differences

**Supplementary Table 2** Baseline characteristics for bilateral patients<sup>a</sup>

| Variable<br>(mean±SD)      | Bilateral First Lead   |                         |                                                | Bilateral Second Lead  |                        |                                                | Bilateral First vs. Second                      |                                                |
|----------------------------|------------------------|-------------------------|------------------------------------------------|------------------------|------------------------|------------------------------------------------|-------------------------------------------------|------------------------------------------------|
|                            | STN<br>(n=67)          | GPi<br>(n=60)           | STN vs.<br>GPi                                 | STN<br>(n=84)          | GPi<br>(n=72)          | STN vs.<br>GPi                                 | STN                                             | GPi                                            |
| Age                        | 61.91±8.82<br>(n=67)   | 63.95±8.56<br>(n=60)    | <i>p</i> =0.19,<br><i>t</i> =-1.32             | 62.73±9.53<br>(n=84)   | 64.79±8.37<br>(n=72)   | <i>p</i> =0.24,<br><i>W</i> =2692              | <i>p</i> =0.42,<br><i>W</i> =2596               | <i>p</i> =0.57,<br><i>t</i> =-0.57             |
| Age at Disease Onset       | 50.46±9.10<br>(n=63)   | 50.31±9.54<br>(n=49)    | <i>p</i> =0.93,<br><i>t</i> =0.09              | 50.87±9.63<br>(n=77)   | 50.42±9.45<br>(n=59)   | <i>p</i> =0.78,<br><i>t</i> =0.27              | <i>p</i> =0.80,<br><i>t</i> =-0.26              | <i>p</i> =0.95,<br><i>t</i> =-0.06             |
| Disease Duration           | 11.11±4.59<br>(n=63)   | 12.39±4.91<br>(n=49)    | <i>p</i> =0.19,<br><i>W</i> =1318              | 11.83±4.54<br>(n=77)   | 13.49±5.15<br>(n=59)   | <i>p</i> =0.052,<br><i>t</i> =-1.96            | <i>p</i> =0.27,<br><i>W</i> =2163               | <i>p</i> =0.26,<br><i>t</i> =-1.14             |
| Months between surgeries   | -                      | -                       | -                                              | 14.75±13.30<br>(n=84)  | 11.87±11.01<br>(n=72)  | <i>p</i> =0.27,<br><i>W</i> =3332              | -                                               | -                                              |
| Gender (male no/no.)       | 52/67                  | 46/60                   | <i>p</i> =0.90,<br><i>X</i> <sup>2</sup> =0.02 | 65/84                  | 43/72                  | <i>p</i> =0.58,<br><i>X</i> <sup>2</sup> =0.30 | <i>p</i> =0.97,<br><i>X</i> <sup>2</sup> =0.001 | <i>p</i> =0.69,<br><i>X</i> <sup>2</sup> =0.16 |
| LEDD                       | 1572±1442.78<br>(n=67) | 1343.4±732.82<br>(n=60) | <i>p</i> =0.46,<br><i>W</i> =1858              | 1119±755.55<br>(n=84)  | 1559±1921.08<br>(n=72) | <b><i>p</i>&lt;0.05,<br/><i>W</i>=2315</b>     | <b><i>p</i>&lt;0.01,<br/><i>W</i>=2083</b>      | <i>p</i> =0.66,<br><i>W</i> =2257              |
| UPDRS-I                    | 2.95±2.05<br>(n=60)    | 2.25±1.93<br>(n=56)     | <i>p</i> =0.054,<br><i>W</i> =2025             | 2.43±1.80<br>(n=80)    | 2.11±1.81<br>(n=69)    | <i>p</i> =0.15,<br><i>W</i> =3133              | <i>p</i> =0.15,<br><i>W</i> =2735               | <i>p</i> =0.71,<br><i>W</i> =2007              |
| UPDRS-II                   | 15.95±5.91<br>(n=59)   | 16.66±5.54<br>(n=56)    | <i>p</i> =0.51,<br><i>t</i> =-0.67             | 13.28±5.52<br>(n=79)   | 14.36±5.33<br>(n=69)   | <i>p</i> =0.23,<br><i>t</i> =-1.21             | <b><i>p</i>&lt;0.01,<br/><i>t</i>=2.70</b>      | <b><i>p</i>&lt;0.05,<br/><i>t</i>=2.35</b>     |
| UPDRS-III Off-med          | 41.17±11.91<br>(n=58)  | 40.71±10.94<br>(n=59)   | <i>p</i> =0.83,<br><i>t</i> =0.22              | 38.54±10.80<br>(n=59)  | 40.67±10.63<br>(n=58)  | <i>p</i> =0.19,<br><i>W</i> =1468              | <i>p</i> =0.15,<br><i>W</i> =1977               | <i>p</i> =0.98,<br><i>t</i> =0.02              |
| UPDRS-III Off-med          | 4.00±2.58<br>(n=58)    | 3.49±2.41<br>(n=59)     | <i>p</i> =0.31,<br><i>W</i> =1896              | 3.44±2.48<br>(n=59)    | 2.66±2.50<br>(n=58)    | <i>p</i> =0.070,<br><i>W</i> =2041             | <i>p</i> =0.24,<br><i>W</i> =1925               | <b><i>p</i>&lt;0.05,<br/><i>W</i>=2080</b>     |
| Contralateral Tremor       |                        |                         |                                                |                        |                        |                                                |                                                 |                                                |
| UPDRS-III Off-med          | 3.71±1.53<br>(n=58)    | 3.36±1.48<br>(n=59)     | <i>p</i> =0.30,<br><i>W</i> =1896              | 3.07±1.40<br>(n=59)    | 3.84±1.71<br>(n=58)    | <b><i>p</i>&lt;0.05,<br/><i>W</i>=1282</b>     | <b><i>p</i>&lt;0.05,<br/><i>W</i>=2139</b>      | <i>p</i> =0.24,<br><i>W</i> =1499              |
| Contralateral Rigidity     |                        |                         |                                                |                        |                        |                                                |                                                 |                                                |
| UPDRS-III Off-med          | 8.05±2.69<br>(n=58)    | 7.59±2.61<br>(n=59)     | <i>p</i> =0.32,<br><i>W</i> =1531              | 7.47±2.43<br>(n=59)    | 8.00±2.82<br>(n=58)    | <i>p</i> =0.28,<br><i>t</i> =1.08              | <i>p</i> =0.23,<br><i>t</i> =1.22               | <i>p</i> =0.46,<br><i>W</i> =1576              |
| Contralateral Bradykinesia |                        |                         |                                                |                        |                        |                                                |                                                 |                                                |
| UPDRS-III Off-med PIGD     | 4.07±2.38<br>(n=58)    | 5.44±3.02<br>(n=59)     | <b><i>p</i>&lt;0.05,<br/><i>W</i>=1262</b>     | 4.00±2.26<br>(n=59)    | 5.79±3.08<br>(n=58)    | <b><i>p</i>&lt;0.001,<br/><i>W</i>=2364</b>    | <i>p</i> =0.84,<br><i>W</i> =1749               | <i>p</i> =0.53,<br><i>W</i> =1597              |
| Berg Balance Scale         | 52.58±4.1 (n=12)       | 48.67±6.39<br>(n=30)    | <b><i>p</i>&lt;0.05<br/><i>W</i>=258</b>       | 50.08±7.27<br>(n=26)   | 49.51±5.15<br>(n=39)   | <i>p</i> =0.19,<br><i>W</i> =409               | <i>p</i> =0.23,<br><i>W</i> =195                | <i>p</i> =0.79,<br><i>W</i> =563               |
| TUG                        | 8.54±2.60 (n=14)       | 9.22±4.08<br>(n=31)     | <i>p</i> =0.71,<br><i>W</i> =202               | 12.62±15.17<br>(n=25)  | 9.96±3.87<br>(n=45)    | <i>p</i> =0.57,<br><i>W</i> =609               | <i>p</i> =0.43,<br><i>W</i> =147                | <i>p</i> =0.15,<br><i>W</i> =562               |
| Dopamine Responsiveness    | -39.11±22.31<br>(n=57) | -34.45±19.51<br>(n=57)  | <i>p</i> =0.08,<br><i>W</i> =1310              | -30.99±18.04<br>(n=54) | -30.05±17.48<br>(n=53) | <i>p</i> =0.78,<br><i>t</i> =-0.27             | <b><i>p</i>&lt;0.01,<br/><i>W</i>=1099</b>      | <i>p</i> =0.21,<br><i>t</i> =-1.25             |
| MMSE                       | 29.05±0.97<br>(n=21)   | 27.75±3.82<br>(n=20)    | <i>p</i> =0.50,<br><i>W</i> =236               | -                      | -                      | -                                              | -                                               | -                                              |

|                      |                      |                      |                                            |                       |                       |                                            |                                             |                                            |
|----------------------|----------------------|----------------------|--------------------------------------------|-----------------------|-----------------------|--------------------------------------------|---------------------------------------------|--------------------------------------------|
| SWAL-QOL             | 85.80±9.58<br>(n=10) | 86.74±7.62<br>(n=17) | <i>p</i> =0.79,<br><i>t</i> =-0.26         | 88.86±10.86<br>(n=14) | 83.95±10.21<br>(n=21) | <i>p</i> =0.08,<br><i>W</i> =95            | <i>p</i> =0.34<br><i>W</i> =53              | <i>p</i> =0.60,<br><i>W</i> =197           |
| Anxiety              | 12±8.09 (n=23)       | 13.25±9.05<br>(n=12) | <i>p</i> =0.98,<br><i>t</i> =-0.02         | 12.29±8.05<br>(n=66)  | 15.00±9.41<br>(n=54)  | <i>p</i> =0.12,<br><i>W</i> =1486          | <i>p</i> =0.58,<br><i>W</i> =700            | <i>p</i> =0.59,<br><i>W</i> =357           |
| Depression           | 10.79±6.46(n=14)     | 8±6.91<br>(n=36)     | <i>p</i> =0.44<br><i>W</i> =289            | 7.79±6.19<br>(n=34)   | 8.41±6.57<br>(n=56)   | <i>p</i> =0.64,<br><i>W</i> =1009          | <i>p</i> =0.10,<br><i>W</i> =166            | <i>p</i> =0.45,<br><i>W</i> =913           |
| Total PDQ            | 31.72±14.87          | 32.79±14.68          | <i>p</i> =0.69,<br><i>t</i> =-0.41         | 23.70±12.51           | 25.87±11.97           | <i>p</i> =0.18,<br><i>W</i> =2647          | <b><i>p</i>&lt;0.001,<br/><i>W</i>=1919</b> | <b><i>p</i>&lt;0.01,<br/><i>W</i>=1540</b> |
| Mobility             | 40.82±26.76          | 49.12±25.58          | <i>p</i> =0.06,<br><i>W</i> =2397          | 34±24.14              | 39.70±21.12           | <i>p</i> =0.08,<br><i>W</i> =2538          | <i>p</i> =0.13,<br><i>W</i> =2405           | <b><i>p</i>&lt;0.05,<br/><i>W</i>=1680</b> |
| ADL                  | 43.66±23.66          | 41.60±23.01          | <i>p</i> =0.64,<br><i>W</i> =2106          | 29.94±18.59           | 31.80±18.65           | <i>p</i> =0.47,<br><i>W</i> =3226          | <b><i>p</i>&lt;0.001,<br/><i>W</i>=3805</b> | <b><i>p</i>&lt;0.05,<br/><i>W</i>=2700</b> |
| Emotional well-being | 30.85±22.41          | 28.02±21.08          | <i>p</i> =0.52,<br><i>W</i> =2143          | 20.41±16.80           | 19.65±16.67           | <i>p</i> =0.88,<br><i>W</i> =2983.         | <b><i>p</i>&lt;0.01,<br/><i>W</i>=2052</b>  | <b><i>p</i>&lt;0.05,<br/><i>W</i>=1691</b> |
| Stigma               | 26.26±23.35          | 24.48±22.64          | <i>p</i> =0.65,<br><i>W</i> =1916          | 12.95±14.93           | 19.75±18.56           | <b><i>p</i>&lt;0.05,<br/><i>W</i>=2369</b> | <b><i>p</i>&lt;0.001,<br/><i>W</i>=3823</b> | <i>p</i> =0.33,<br><i>W</i> =2373          |
| Social support       | 16.48±19.33          | 14.51±19.55          | <i>p</i> =0.39,<br><i>W</i> =2181          | 9.97±14.58            | 11.46±17.28           | <i>p</i> =0.51,<br><i>W</i> =3196          | <b><i>p</i>&lt;0.05,<br/><i>W</i>=3459</b>  | <i>p</i> =0.34,<br><i>W</i> =2358          |
| Cognition            | 28.17±17.82          | 27.55±18.44          | <i>p</i> =0.69,<br><i>W</i> =2094          | 22.92±15.48           | 21.40±14.86           | <i>p</i> =0.53,<br><i>W</i> =3200          | <b><i>p</i>&lt;0.05,<br/><i>W</i>=3345</b>  | <i>p</i> =0.07,<br><i>W</i> =2559          |
| Communication        | 28.54±18.67          | 29.86±22.01          | <i>p</i> =0.97,<br><i>W</i> =2001          | 24.31±17.85           | 22.86±17.09           | <i>p</i> =0.65,<br><i>W</i> =3150          | <i>p</i> =0.16,<br><i>W</i> =3190           | <i>p</i> =0.11,<br><i>W</i> =2508          |
| Bodily discomfort    | 38.99±22.64          | 47.01±21.55          | <b><i>p</i>&lt;0.05,<br/><i>W</i>=1574</b> | 31.80±22.67           | 39.41±20.73           | <b><i>p</i>&lt;0.01,<br/><i>W</i>=2291</b> | <b><i>p</i>&lt;0.05,<br/><i>W</i>=3428</b>  | <b><i>p</i>&lt;0.05,<br/><i>W</i>=2641</b> |

<sup>a</sup>Bold values represent significant differences

**Supplementary Table 3** Confidence intervals of estimated marginal means for significant interactions

| Model      | PDQ Score            | Model Variable | Interaction<br>(x vs. y) | x              | y              |
|------------|----------------------|----------------|--------------------------|----------------|----------------|
| Unilateral | ADL                  | PIGD           | STN vs. GPi              | 0.46 – 3.99    | -2.54 – -0.21  |
| Bilateral  | Total                | LEDD           | First vs. Second         | 0.03 – 0.15    | 0.005 – 0.04   |
| Bilateral  | Total                | LEDD           | STN vs. GPi              | 0.04 – 0.12    | 0.002 – 0.06   |
| Bilateral  | Total                | Tremor         | First vs. Second         | -4.48 – 13.57  | -12.60 – 0.91  |
| Bilateral  | Mobility             | Rigidity       | STN vs. GPi              | -13.41 – -0.49 | -1.82 – 5.23   |
| Bilateral  | Mobility             | LEDD           | First vs. Second         | 0.001 – 0.049  | -0.008 – 0.008 |
| Bilateral  | ADL                  | LEDD           | First vs. Second         | 0.0003 – 0.038 | -0.008 – 0.005 |
| Bilateral  | ADL                  | Baseline score | First vs. Second         | -1.23 – -0.53  | -0.50 – 0.005  |
| Bilateral  | Emotional well-being | Baseline score | First vs. Second         | -0.88 – -0.38  | -0.47 – 0.005  |
| Bilateral  | Emotional well-being | Tremor         | First vs. Second         | 0.002 – 4.94   | -3.6 – 0.13    |
| Bilateral  | Cognition            | Baseline score | First vs. Second         | -0.92 – -0.42  | -0.15 – 0.30   |

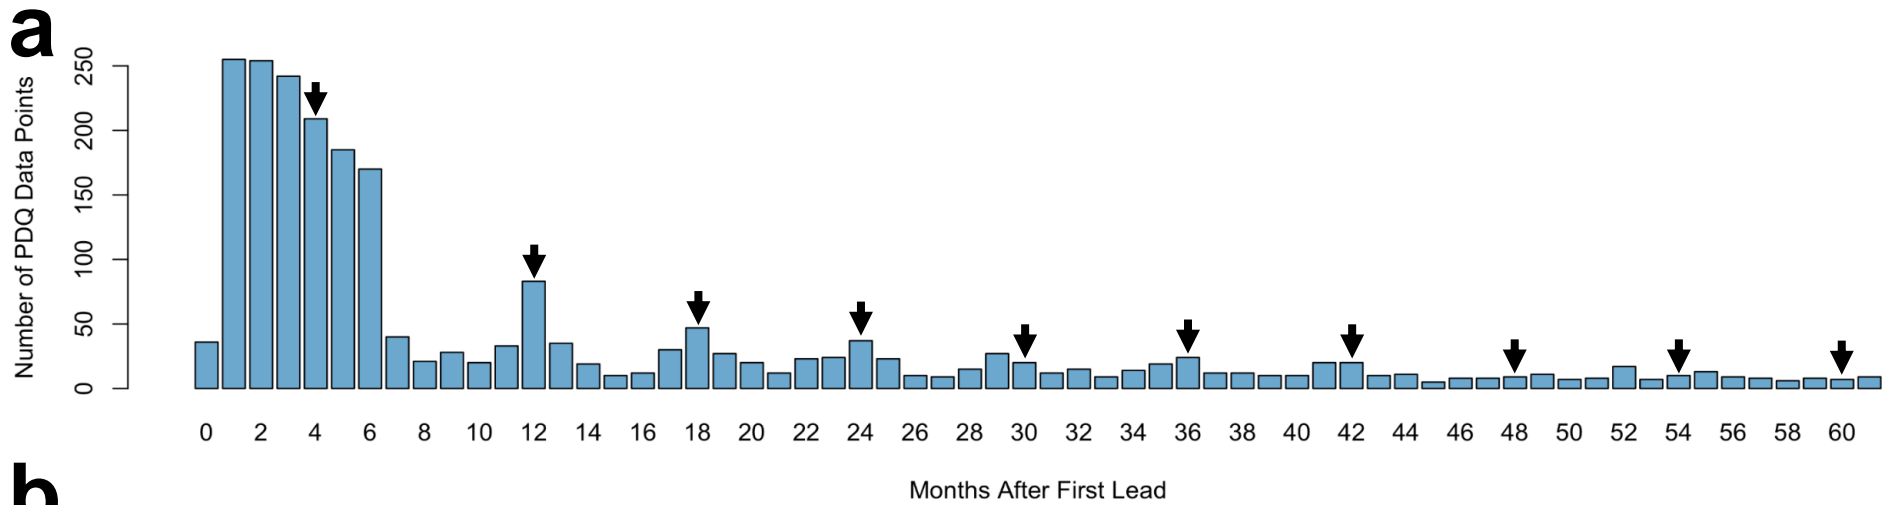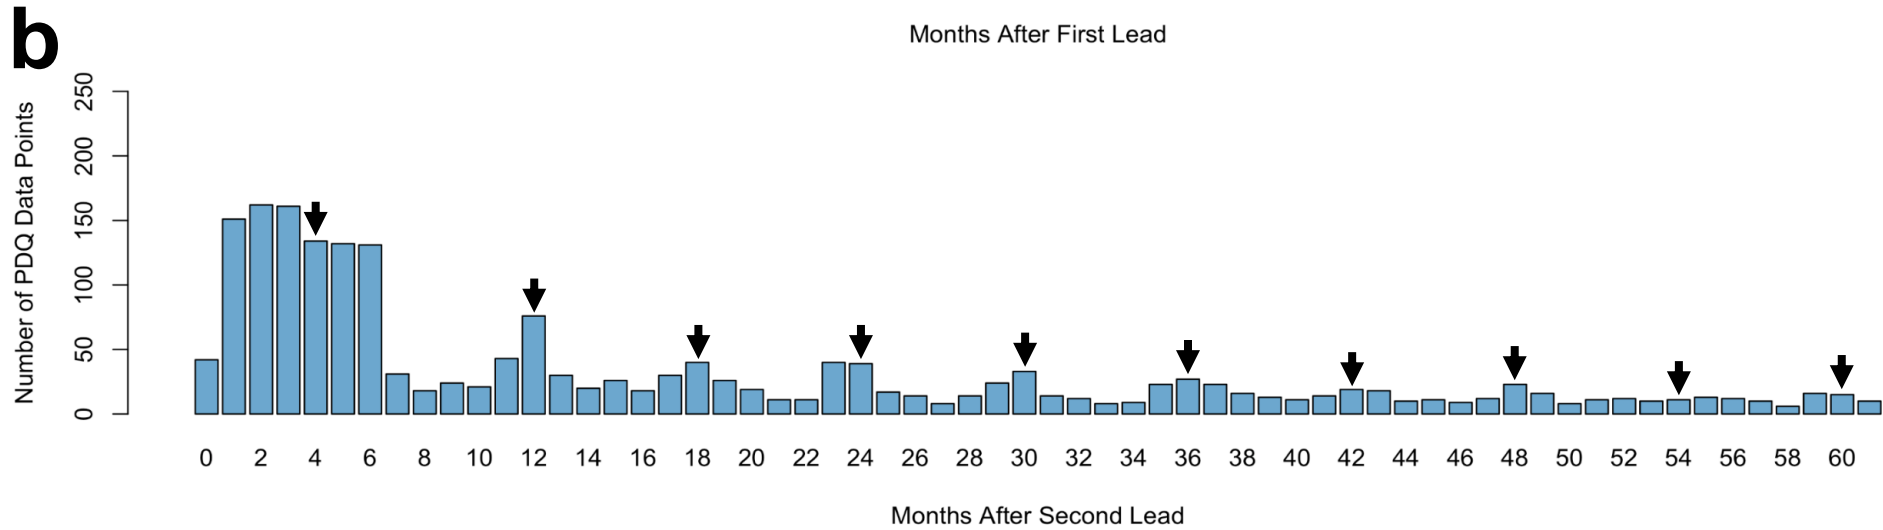

**Supplementary Figure 1.** The number of PDQ time points in our retrospective database. The first lead (a) includes unilateral leads and the first lead for bilateral patients. The second lead (b) only represents the second lead of bilateral patients. There are peaks seen at 4, 12, 18, 24, 30, 36, 42, 48, 54, and 60 months, which are denoted by arrows.
